# Supplementary material for: Electrically tunable non-radiative lifetime in WS2/WSe2 heterostructures
Source: Royal Society of Chemistry journal article supplement (doi:10.1039/d4nr01982b), 2024-01-01
Supplement: d4nr01982b1.pdf [file d4nr01982b1.pdf]

## Supporting Information

### Electrically-tunable non-radiative lifetime in WS<sub>2</sub>/WSe<sub>2</sub> heterostructure

Anran Wang,<sup>a</sup> Xingguang Wu,<sup>b</sup> Siwen Zhao,<sup>b</sup> Zheng Vitto Han,<sup>c</sup> Yi Shi,<sup>a</sup> Giulio Cerullo<sup>d,e</sup> and Fengqiu Wang<sup>\*a</sup>

<sup>a</sup>School of Electronic Science and Engineering, Nanjing University, Nanjing 210093, China

<sup>b</sup>Shenyang National Laboratory for Materials Science, Institute of Metal Research, Chinese Academy of Sciences, Shenyang 110016, China

<sup>c</sup>State Key Laboratory of Quantum Optics and Quantum Optics Devices, Institute of Opto-Electronics, Shanxi University, Taiyuan 030006, China

<sup>d</sup>Dipartimento di Fisica, Politecnico di Milano, Piazza Leonardo da Vinci 32, I-20133 Milano, Italy

<sup>e</sup>Istituto di Fotonica e Nanotecnologie (IFN), CNR, Piazza Leonardo da Vinci 32, I-20133 Milano, Italy

**Supplementary Note 1. Back-gate dependent TRPL results of WS<sub>2</sub>/WSe<sub>2</sub> at WS<sub>2</sub> resonant energy (~2.00 eV)**

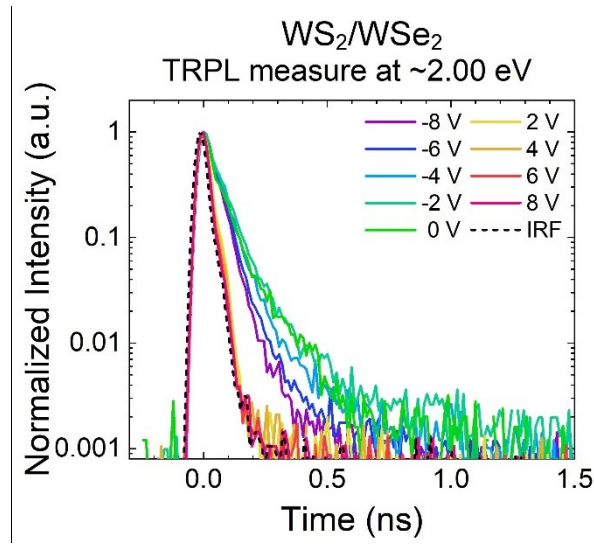

**Supplementary Figure S1.** Normalized time-resolved PL results of WS<sub>2</sub>/WSe<sub>2</sub> heterostructure at WS<sub>2</sub> resonant energy (~2.00 eV) under different back-gate voltages. The black dashed line represents the IRF for the TRPL setup. All the measurements were performed at 7 K.

The TRPL of WS<sub>2</sub>/WSe<sub>2</sub> heterostructure measured at WS<sub>2</sub> resonance (~2.00 eV) is shown in Supplementary Fig. S1. The PL lifetimes also exhibit clear gate-voltage dependence, with the longest lifetime at charge-neutrality point.

**Supplementary Note 2. Back-gate dependent TAS results of WS<sub>2</sub>/WSe<sub>2</sub> heterostructure across the A-exciton resonance range of WSe<sub>2</sub>**

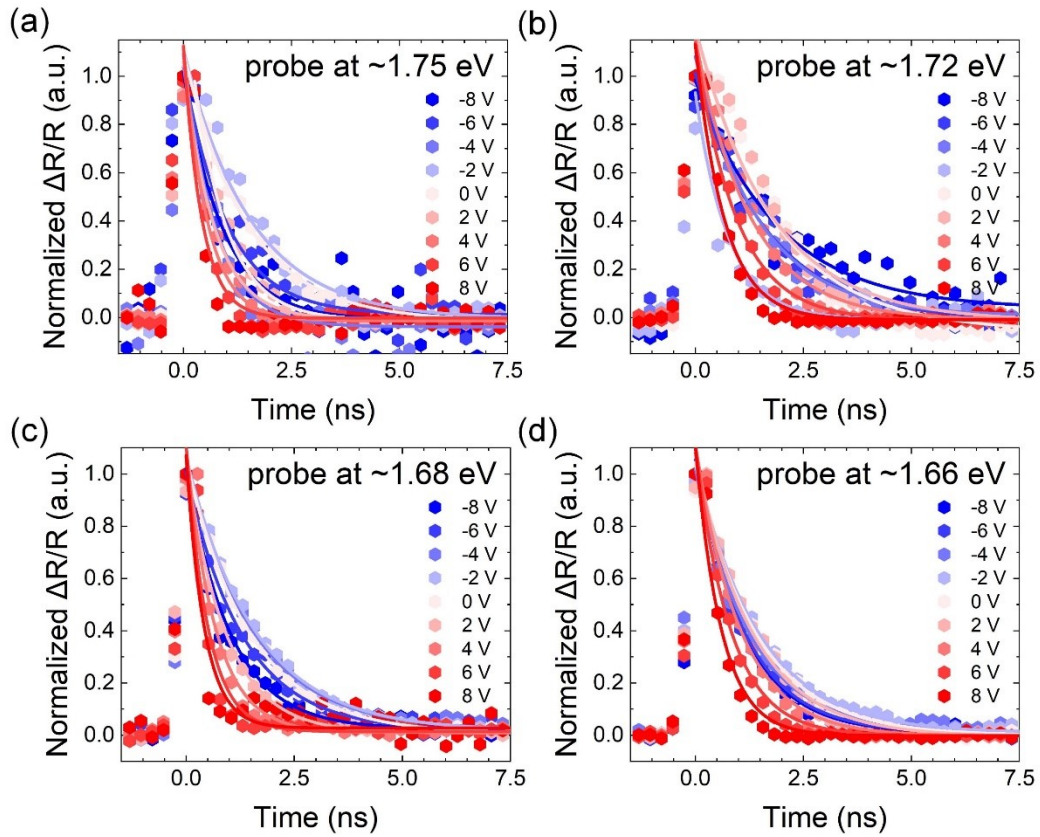

**Supplementary Figure S2.** Normalized transient reflectance of WS<sub>2</sub>/WSe<sub>2</sub> heterostructure at probe energy of (a) 1.75 eV, (b) 1.72 eV, (c) 1.68 eV and (d) 1.66 eV under different back-gate voltages. All the measurements were performed at 7 K.

To investigate the probe energy-dependence of the electrically-tuned non-radiative lifetimes of the WS<sub>2</sub>/WSe<sub>2</sub> heterostructure, transient reflectivity has been measured varying the probe energy from 1.66 eV to 1.75 eV under different back-gate voltages. As is shown in Supplementary Fig. S2, the back-gate voltage dependence of dynamics can be observed across the A-exciton resonance range of WSe<sub>2</sub>.

### Supplementary Note 3. Pump-power dependent TAS results of WS<sub>2</sub>/WSe<sub>2</sub> heterostructure

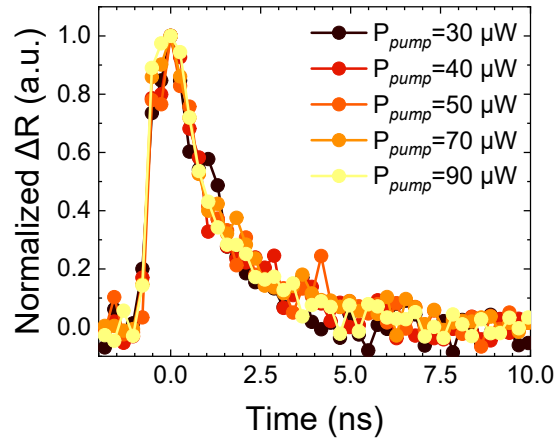

**Supplementary Figure S3.** Normalized transient reflectance of WS<sub>2</sub>/WSe<sub>2</sub> heterostructure with probe energy of  $\sim 1.68$  eV without back-gate voltage under different pump power. All the measurements were performed at 7 K.

To investigate the effects of exciton-exciton annihilation (EEA) as the non-radiative recombination dynamics of WS<sub>2</sub>/WSe<sub>2</sub> heterostructure, the pump-power dependent transient reflectance is shown in Supplementary Fig. S3. It is noticed that the non-radiative lifetimes exhibit trivial changes within the range of applied pump power, indicating the negligible effects of EEA.

**Supplementary Note 4. Electrically-tunable non-radiative lifetimes in near-aligned WS<sub>2</sub>/WSe<sub>2</sub> heterostructure**

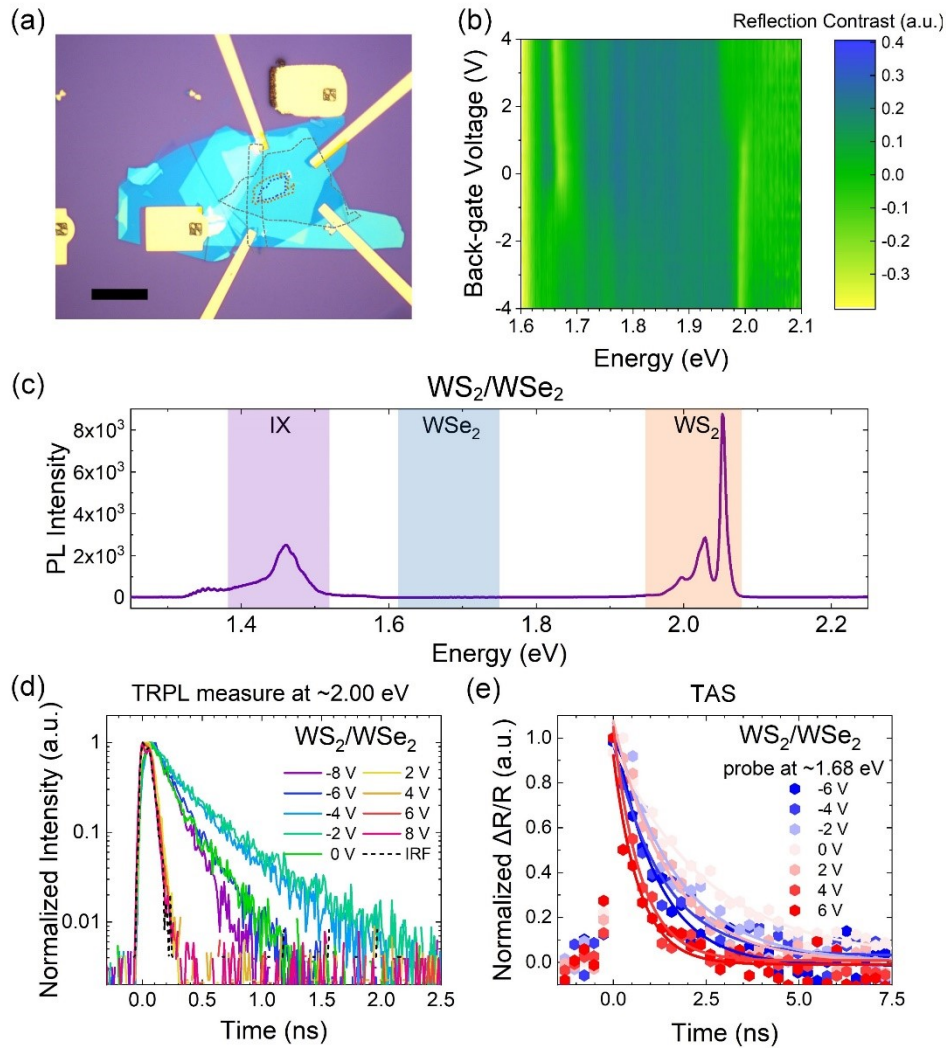

**Supplementary Figure S4.** (a) Optical microscopy image of near-aligned WS<sub>2</sub>/WSe<sub>2</sub> heterostructure. The scale bar is 20 μm. (b) Back-gate-voltage-dependent reflection contrast of near-aligned WS<sub>2</sub>/WSe<sub>2</sub> heterostructure. (c) Photoluminescence spectrum of the near-aligned WS<sub>2</sub>/WSe<sub>2</sub> heterostructure. (d) Normalized TRPL dynamics of near-aligned WS<sub>2</sub>/WSe<sub>2</sub> heterostructure at WS<sub>2</sub> resonant energy (~2.00 eV) under different back-gate voltages. (e) Normalized transient reflectance of near-aligned WS<sub>2</sub>/WSe<sub>2</sub> heterostructure with probe energy of ~1.68 eV under different back-gate voltages. All the measurements were performed at 7 K.

To investigate the potential twist-angle-dependence of the electrically-tuned non-radiative lifetimes, we fabricated a near-aligned WS<sub>2</sub>/WSe<sub>2</sub> heterostructure and studied

the back-gate modulation of exciton dynamics using transient photoluminescence and absorption spectroscopy at low temperature. The results are shown in Supplementary Fig. S4. The photoluminescence spectrum at 7 K exhibit strong emission of intralayer excitons of WS<sub>2</sub> and interlayer excitons, indicating that the stacking of this WS<sub>2</sub>/WSe<sub>2</sub> sample is near aligned. As shown in Supplementary Fig. S4d, the PL lifetimes measured at ~2.00 eV show similar gate-voltage dependence. The different time constant from the manuscript sample may be related to the sample quality and different excitation power. In Supplementary Fig. S4e, the transient reflectance probed at ~1.68 eV exhibit strong back-gate dependence same as manuscript, suggesting that the electrically-controlled non-radiative lifetimes is not strongly influenced by the stacking of heterostructure.

**Supplementary Table S1.** Back-gate dependent TAS fitting results of monolayer WSe<sub>2</sub> and WS<sub>2</sub>/WSe<sub>2</sub> heterostructure probed at ~1.68 eV

| Back-gate Voltage [V] | TAS Lifetime [ps]<br>of WSe <sub>2</sub> | TAS Lifetime [ps]<br>of WS <sub>2</sub> /WSe <sub>2</sub> |
|-----------------------|------------------------------------------|-----------------------------------------------------------|
| -8                    | 692±14                                   | 1023±59                                                   |
| -4                    | 670±12                                   | 1524±38                                                   |
| 0                     | 674±10                                   | 1472±29                                                   |
| 4                     | 773±15                                   | 675±34                                                    |
| 8                     | 783±19                                   | 422±41                                                    |
